# Supplementary material for: Impact of Covid-19 Lockdown on Availability of Drinking Water in the Arsenic-Affected Ganges River Basin
Source: MDPI journal article supplement (doi:10.3390/ijerph18062832), 2021-03-10
Supplement: s1 [file s1]

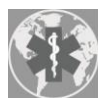

## Supplementary Information

**Table S1.** Sampling locations showing three different land use patterns across middle and lower reaches of Ganges river.

|              | Places                 | Land use         |
|--------------|------------------------|------------------|
| Middle Reach | Gai Ghat               | Urban            |
|              | Gulbi Ghat             | Urban-industrial |
|              | Jail Ghat Buxar        | Urban            |
|              | Kachchi Dargah         | Urban            |
|              | Kurji Diggha           | Urban            |
|              | NIT                    | Urban            |
|              | Ramrekha Ghat Buxar    | Urban-industrial |
|              | Kewalaghat             | Urban            |
|              | Triveni Ghat Fathua    | Urban            |
|              | Buxar Bridge           | Urban            |
|              | Chausa Buxar           | Peri-urban-rural |
|              | Begusarai Simaria Ghat | Peri-urban-rural |
|              | Danapur Pipapul        | Urban            |
| Lower Reach  | Garden Reach           | Urban-industrial |
|              | Kalyani                | Urban            |
|              | Palta                  | Urban-industrial |
|              | Sreerampore            | Urban-industrial |
|              | Berhampore             | Urban            |
|              | Diamond Harbour        | Peri-urban-rural |

**Table S2.** Summary of observations for the changes of water quality parameters in comparison of lockdown months (April-May 2020) to pre-and-post lockdown periods of 2020.

| Parameters      | Middle Reach              | Lower Reach                |
|-----------------|---------------------------|----------------------------|
| Faecal Coliform | Decreased - (28.6±1.2%)   | Decreased - (3.5 ±0.25%)   |
| BOD             | Decreased - (32 (± 1.01%) | Decreased - (58.1 ± 0.03%) |
| COD             | Decreased - (9.2 ±0.3%)   | Decreased - (55.7 ± 0.04%) |
| pH              |                           | Increased                  |
| TDS             | Similar                   | Decreased                  |
| Sulphate        | No data                   | Increased + (14 ±1.02%)    |
| Phosphate       | No data                   | Increased (2.03 ±0.3%)     |
| Nitrate         | No data                   | Similar                    |

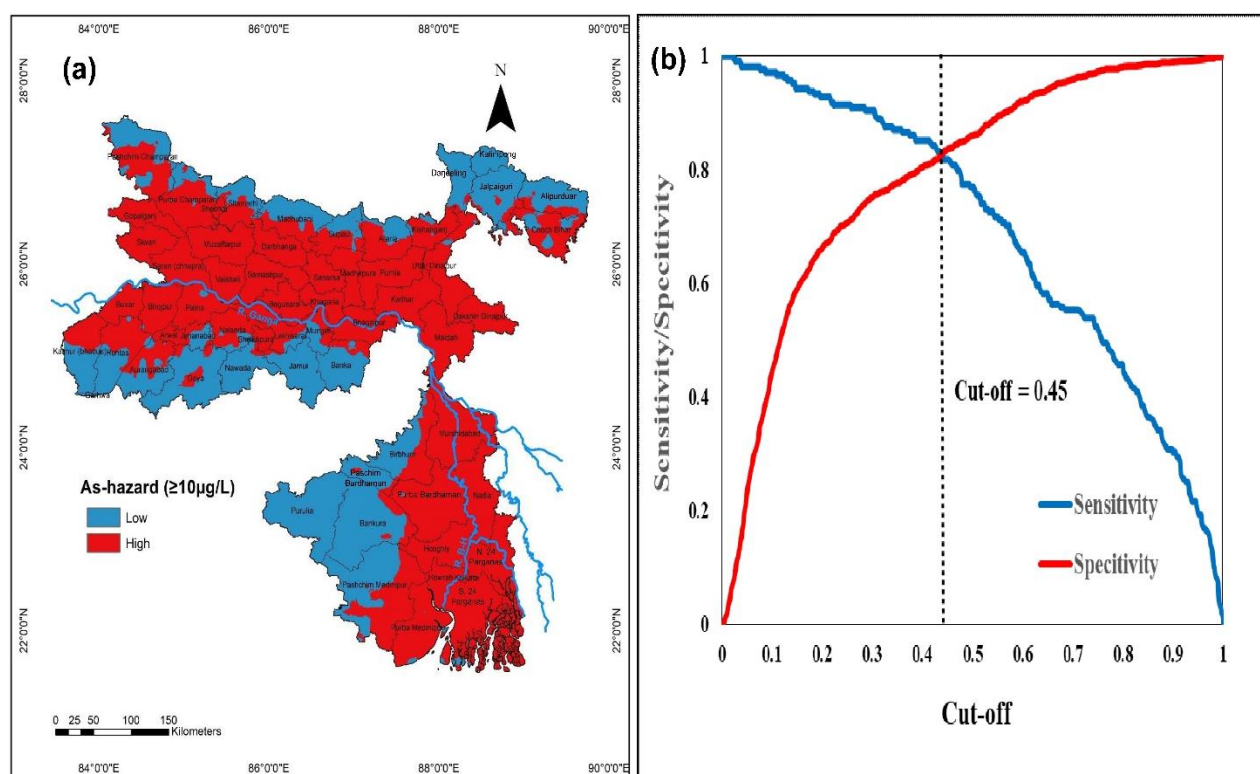

**Figure S1.** (a) Binary risk map showing areas with high and low risk of groundwater As prepared using the RF predicted probabilities and cut-off 0.45. (b) RF model sensitivity and specificity vs. cut-off (adopted from Mukherjee et al., 2020).
